# Supplementary material for: Distress and Wellbeing among General Practitioners in 33 Countries during COVID-19: Results from the Cross-Sectional PRICOV-19 Study to Inform Health System Interventions
Source: MDPI journal article supplement (doi:10.3390/ijerph19095675), 2022-05-06
Supplement: s1 [file s1]

**Table S1.** Responses in each country for eWBI score, sampling method, and overall response rate.

|                        | <b>n</b>    | <b>Study Invitation Sent to [10]:</b>                                         | <b>Overall Response Rate [10]</b> |
|------------------------|-------------|-------------------------------------------------------------------------------|-----------------------------------|
| Austria                | 110         | Random national sample                                                        | 28.0%                             |
| Belgium                | 406         | Random national sample with additional convenience sample                     | 29.7%                             |
| Bosnia and Herzegovina | 26          | Total population                                                              | 5.5%                              |
| Bulgaria               | 76          | Convenience national sample                                                   | 94.3%                             |
| Croatia                | 97          | Convenience national sample                                                   | 11.7%                             |
| Czechia                | 91          | Random national sample from four regions and from list of young practitioners | 22.0%                             |
| Denmark                | 35          | Total population                                                              | 1.5%                              |
| Estonia                | 100         | Total population                                                              | 13.9%                             |
| Finland                | 59          | Convenience national sample                                                   | 15.5%                             |
| France                 | 457         | Total population                                                              | 2.1%                              |
| Germany                | 228         | Convenience sample in six areas                                               | 15.5%                             |
| Greece                 | 52          | Random national sample                                                        | 94.0%                             |
| Hungary                | 165         | Convenience national sample                                                   | 23.4%                             |
| Iceland                | 23          | Convenience national sample                                                   | 23.8%                             |
| Ireland                | 154         | Total population                                                              | 12.2%                             |
| Israel                 | 38          | Convenience national sample                                                   | 21.8%                             |
| Italy                  | 101         | Convenience national sample                                                   | 25.6%                             |
| Kosovo*                | 34          | Convenience sample in five areas                                              | 73.3%                             |
| Latvia                 | 108         | Total population                                                              | 9.2%                              |
| Lithuania              | 38          | Convenience national sample                                                   | 22.5%                             |
| Malta                  | 7           | Total population                                                              | 6.5%                              |
| Moldavia               | 44          | Convenience sample from two municipalities                                    | 24.2%                             |
| Netherlands            | 141         | Random national sample with additional convenience sample                     | 18.9%                             |
| Norway                 | 117         | Total population                                                              | 10.5%                             |
| Poland                 | 124         | Convenience national sample                                                   | 10.4%                             |
| Portugal               | 172         | Random national sample with additional convenience sample                     | 22.9%                             |
| Romania                | 75          | Convenience national sample                                                   | 25.0%                             |
| Serbia                 | 91          | Convenience national sample                                                   | 90.0%                             |
| Slovenia               | 132         | Convenience national sample                                                   | 19.8%                             |
| Spain                  | 227         | Convenience national sample                                                   | 77.0%                             |
| Sweden                 | 18          | Convenience national sample                                                   | 7.2%                              |
| Switzerland            | 73          | Convenience sample                                                            | 32.0%                             |
| Turkey                 | 92          | Convenience sample                                                            | 27.9%                             |
| <b>TOTAL</b>           | <b>3711</b> |                                                                               | <b>27.8%</b>                      |

\* All references to Kosovo, whether the territory, institutions, or population, in this project shall be understood in full compliance with the United Nations Security Council Resolution 1244 and the ICJ Opinion on the Kosovo declaration of independence, without prejudice to the status of Kosovo.

**Table S2.** Results of mixed effects logistic regression analysis of potential predictors for being at risk of distress in GPs (eWBI score  $\geq 2$ ) during the COVID-19 pandemic.

| Mixed Effects Logistic Regression Models, Odds Ratio (95% CI) for eWBI Score $\geq 2$ |                              |                               |                                |                               |
|---------------------------------------------------------------------------------------|------------------------------|-------------------------------|--------------------------------|-------------------------------|
|                                                                                       | Model I: Odds Ratio (95% CI) | Model II: Odds Ratio (95% CI) | Model III: Odds Ratio (95% CI) | Model IV: Odds Ratio (95% CI) |
| Intercept                                                                             | 1.87 (1.43, 2.46)***         | 1.11 (0.81, 1.52)             | 0.52 (0.32, 0.86)*             | 0.63 (0.33, 1.22)             |
| GP experience                                                                         |                              |                               |                                |                               |
| 30–39 years                                                                           |                              | Ref.                          | Ref.                           | Ref.                          |
| 20–29 years                                                                           |                              | 1.78 (1.44, 2.19)***          | 1.84 (1.47, 2.29)***           | 1.64 (1.27, 2.12)***          |
| 10–19 years                                                                           |                              | 2.03 (1.63, 2.51)***          | 2.24 (1.79, 2.80)***           | 1.91 (1.46, 2.49)***          |
| 0–9 years                                                                             |                              | 1.94 (1.57, 2.40)***          | 2.07 (1.65, 2.59)***           | 1.56 (1.20, 2.03)***          |
| Number of GP staff in practice                                                        |                              |                               |                                |                               |
| $\geq 5$                                                                              |                              |                               | Ref.                           | Ref.                          |
| 3–4                                                                                   |                              |                               | 1.17 (0.92, 1.48)              | 1.09 (0.83, 1.44)             |
| 2                                                                                     |                              |                               | 1.27 (0.98, 1.65)              | 1.25 (0.92, 1.70)             |
| 1                                                                                     |                              |                               | 1.36 (1.06, 1.75)*             | 1.42 (1.06, 1.91)*            |
| Practice location                                                                     |                              |                               |                                |                               |
| Big (inner)city                                                                       |                              |                               | Ref.                           | Ref.                          |
| Suburbs                                                                               |                              |                               | 0.99 (0.75, 1.29)              | 0.97 (0.70, 1.33)             |
| (Small) town                                                                          |                              |                               | 1.14 (0.91, 1.44)              | 1.20 (0.92, 1.57)             |
| Mixed urban–rural                                                                     |                              |                               | 1.33 (1.06, 1.66)              | 1.25 (0.97, 1.62)             |
| Rural                                                                                 |                              |                               | 1.08 (0.86, 1.36)              | 1.25 (0.95, 1.64)             |
| Patient population: chronic disease                                                   |                              |                               |                                |                               |
| Below average                                                                         |                              |                               | Ref.                           | Ref.                          |
| Approximately average                                                                 |                              |                               | 1.12 (0.79, 1.59)              | 1.06 (0.71, 1.59)             |
| Above average                                                                         |                              |                               | 1.59 (1.11, 2.28)*             | 1.42 (0.94, 2.16)             |
| Patient population: financial problems                                                |                              |                               |                                |                               |
| Below average                                                                         |                              |                               | Ref.                           | Ref.                          |
| Approximately average                                                                 |                              |                               | 1.29 (1.07, 1.55)**            | 1.24 (1.00, 1.55)             |
| Above average                                                                         |                              |                               | 1.46 (1.15, 1.84)**            | 1.40 (1.07, 1.84)*            |
| Collaboration from neighborhood practices (0–4)                                       |                              |                               |                                | 0.90 (0.83, 0.97)**           |
| Adequate government support (0–4)                                                     |                              |                               |                                | 0.74 (0.68, 0.81)***          |
| Responsibilities have increased (0–4)                                                 |                              |                               |                                | 1.31 (1.19, 1.44)***          |
| Further training for amended responsibilities needed (0–4)                            |                              |                               |                                | 1.31 (1.20, 1.42)***          |
| Enough protected time for reviewing guidelines/literature (0–4)                       |                              |                               |                                | 0.77 (0.72, 0.83)***          |
| Intercept variance (s.e.)                                                             | 0.58 (0.16)***               | 0.62 (0.17)***                | 0.60 (0.17)***                 | 0.29 (0.10)**                 |
| MODEL INFORMATION                                                                     |                              |                               |                                |                               |
| Akaike's Information Criterion (AIC)                                                  | 16482.19                     | 16527.38                      | 15642.09                       | 13248.64                      |
| –2 Log Likelihood                                                                     | 16480.19                     | 16525.38                      | 15640.09                       | 13246.64                      |
| Likelihood ratio test                                                                 |                              | 45.19 (df=3)***               | 885.29 (df=11)***              | 2393.45 (df=16)***            |

\*  $p < 0.05$ ; \*\*  $p < 0.01$ ; \*\*\*  $p < 0.001$ .
